# Supplementary material for: Medical Doctors’ Offline Computer-Assisted Digital Education: Systematic Review by the Digital Health Education Collaboration
Source: PubMed Central journal article supplement (PMC6418481; doi:10.2196/12998), 2019-03-01
Supplement: jmir_v21i2e12998_app2.pdf [file jmir_v21i2e12998_app2.pdf]

# Medical doctors' offline-computer-assessed digital education: a systematic review by the Digital Health Education collaboration

## Online Supplementary Document 2

**Table 1: Excluded studies and reason for exclusion:**

| NO | Study          | Reason for exclusion                                                                                          |
|----|----------------|---------------------------------------------------------------------------------------------------------------|
| 1  | Akar 2014      | The participants were not doctor                                                                              |
| 2  | Albert 2007    | The intervention was CD-ROM followed by e-mail messages                                                       |
| 3  | Aly 2012       | The intervention was Internet-based                                                                           |
| 4  | Ambrosio 2014  | The study was not computer-based                                                                              |
| 5  | Ameen 2005     | The study participants were nurses                                                                            |
| 6  | Backstein 2004 | The intervention taught psychomotor skill                                                                     |
| 7  | Backstein 2005 | The intervention taught psychomotor skill                                                                     |
| 8  | Bayne 1997     | The study participants were nurses                                                                            |
| 9  | Beckley 2000   | Participants were both midwives and doctors. Results of intervention cannot be separated                      |
| 10 | Beidas 2012    | Data could not be extracted (mixed group: doctor and therapists)                                              |
| 11 | Benharash 2012 | Data could not be extracted (mixed group: doctor and undergraduate students), simulator-based intervention    |
| 12 | Benjamin 2008  | The intervention was web based and participants were mixed group of health professionals                      |
| 13 | Bhatia 2015    | Protocol (ongoing study)                                                                                      |
| 14 | Bhatti 2011    | The intervention was web-based and percipients were medical students                                          |
| 15 | Blair 2012     | The intervention was Internet-based                                                                           |
| 16 | Boh, 1990      | The study participants were pharmacists.                                                                      |
| 17 | Boncyk 2016    | Data could not be extracted, mixed group of participant                                                       |
| 18 | Box 2011       | The study evaluate psychomotor skills on simulator. Participants were mixed group:doctor and medical students |
| 19 | Brandt 2006    | The study participants were medical students and the outcome was a psychomotor skill                          |
| 20 | Bredesen 2016  | The study participants were nurses                                                                            |
| 21 | Broughton 2011 | The study was not RCT and the participants were nurses and recreation officers                                |
| 22 | Brown 2014     | The intervention was Mixed, the offline computer-based effect cannot be separately evaluated                  |

|    |                     |                                                                                                                                                                    |
|----|---------------------|--------------------------------------------------------------------------------------------------------------------------------------------------------------------|
| 23 | Browne 2004         | The study was not RCT                                                                                                                                              |
| 24 | Buchanan 2014       | The participants were not doctor occupational therapists                                                                                                           |
| 25 | Butzlaff 2004       | The intervention was web-based                                                                                                                                     |
| 26 | Campos 2011         | The intervention assessed psychomotor skill                                                                                                                        |
| 27 | Chan 2013           | The study was not RCT and the participants were nurses                                                                                                             |
| 28 | Chen 1998           | The participants were dental auxiliaries                                                                                                                           |
| 29 | Chiu 2009           | The study participants were nurses                                                                                                                                 |
| 30 | Clement 2011        | The study participants were Student nurses                                                                                                                         |
| 31 | Collins 2015        | Data could not be extracted, mixed group of physicians: plastic or orthopedic surgeons, and allied health professionals; physiotherapists, occupational therapists |
| 32 | Cox 2011            | The participants were nurses                                                                                                                                       |
| 33 | Danley 2004         | Data could not be extracted, mixed group, dentists and students                                                                                                    |
| 34 | Datta 2012          | The study was not RCT                                                                                                                                              |
| 35 | Davis 2008          | The study participants were medical students                                                                                                                       |
| 36 | de Beurs 2015       | Mixed group results for doctors cannot be extracted separately                                                                                                     |
| 37 | de Beurs 2016       | Data could not be extracted, mixed group of (nurses, psychologists, psychiatrists, & physicians)                                                                   |
| 38 | Devitt 1998         | Data could not be extracted, mixed group of health professionals                                                                                                   |
| 39 | Dimeff 2011         | Data could not be extracted, mixed group of health professionals                                                                                                   |
| 40 | Dols 1995           | The study participants were Nurses                                                                                                                                 |
| 41 | Donyai 2015         | The study participants were pharmacists.                                                                                                                           |
| 42 | Downs 2006          | Data could not be extracted, mixed group of health professionals                                                                                                   |
| 43 | Dozor 2011          | The intervention was Mixed, the offline computer-based effect cannot be separately evaluated                                                                       |
| 44 | Drevenhorn 2015     | The study participants were nurses                                                                                                                                 |
| 45 | Ebadi 2015          | The study participants were nurse .                                                                                                                                |
| 46 | Edrich 2014         | The intervention was web-based                                                                                                                                     |
| 47 | Ekama Ilesanmi 2016 | The study participants were Nurses                                                                                                                                 |
| 48 | El Saadawi 2010     | The intervention was Internet-based                                                                                                                                |
| 49 | Elmore 2013         | The study was not RCT                                                                                                                                              |
| 50 | Erkonen 1994        | A long term follow up of an included study (Dallasandro)                                                                                                           |
| 51 | Erler 2012          | Mixed intervention, the offline computer-based effect cannot be separately evaluated                                                                               |
| 52 | Fernandez 2013      | Data for doctors could not be extracted, mixed group of health professionals                                                                                       |
| 53 | Fisher 2014         | The study participants were nurses.                                                                                                                                |
| 54 | Friedman 1999       | Participants were not randomised.                                                                                                                                  |

|    |                     |                                                                                                                   |
|----|---------------------|-------------------------------------------------------------------------------------------------------------------|
| 55 | Gandsas 2004        | The two groups interventions require a local area network                                                         |
| 56 | Gasko 2012          | The study participants were student registered nurse anaesthetists                                                |
| 57 | Gauger 2010         | The intervention taught psychomotor skill                                                                         |
| 58 | Gelb 2001           | The study participants were medical students                                                                      |
| 59 | Geller 2014         | The intervention was web-based                                                                                    |
| 60 | Giglioli 2012       | The intervention taught psychomotor skill only                                                                    |
| 61 | Girgis 2009         | Intervention was workshop and remote digital learning by video conference (online)                                |
| 62 | Glick 2012          | The study participants were medical students and ED personnel<br>intervention aims to improve psychomotor skills. |
| 63 | Gold 2004           | The intervention was web-based                                                                                    |
| 64 | Guerra-Wallace 2010 | The intervention was simulator- based                                                                             |
| 65 | Hadley 2010         | The intervention was web-based                                                                                    |
| 66 | Hamilton 2001       | The intervention was simulation -based                                                                            |
| 67 | Handmaker 1999      | Data could not be extracted, mixed group of health professionals                                                  |
| 68 | Hansen 2015         | The study not RCT                                                                                                 |
| 69 | Harrington 2002     | The study participants were nurses                                                                                |
| 70 | Harrington 2003     | The study participants were nurses                                                                                |
| 71 | Harrington 2004     | The study participants were nurses                                                                                |
| 72 | Harvey 2013         | The intervention was aiming at improving psychomotor skills                                                       |
| 73 | Hashimoto 2013      | The intervention was virtual reality-based, and the outcome was improvement in psychomotor skills                 |
| 74 | Hemmati 2013        | The intervention was Internet-based                                                                               |
| 75 | Holmboe 2004        | The intervention did not contain eLearning                                                                        |
| 76 | Holmes 2012         | The intervention was high- fidelity simulator-based aiming at improving psychomotor skill                         |
| 77 | Horn 1992           | Data could not be extracted, mixed group of residents, interns and medical students                               |
| 78 | Hsu 2014            | The study participants were nurses                                                                                |
| 79 | Hymowitz 2004       | The intervention was web-based                                                                                    |
| 80 | Hymowitz 2007       | The intervention was web-based                                                                                    |
| 81 | Jain 2010           | The intervention was web-based                                                                                    |
| 82 | Javadi 2015         | The study participants were pharmacists.                                                                          |
| 83 | Karam 2015          | The intervention taught psychomotor skill                                                                         |
| 84 | Khouli 2009         | The study based on teaching psychomotor skills and debriefing based on performance on simulator                   |
| 85 | Koropchak 2006      | It is a protocol (phase two study, no results)                                                                    |
| 86 | Krogh 2014          | The study participants were medical students                                                                      |

|     |                       |                                                                                                                                             |
|-----|-----------------------|---------------------------------------------------------------------------------------------------------------------------------------------|
| 87  | Kulier 2009           | The intervention was Internet-based                                                                                                         |
| 88  | Kulier 2010           | The intervention was Internet-based                                                                                                         |
| 89  | Kulier 2012           | The intervention was Internet-based                                                                                                         |
| 90  | Lange 1997            | The study participants were nurses                                                                                                          |
| 91  | Latif 2009            | The intervention was simulation-based and the participants were mixed group of health professionals                                         |
| 92  | Latzke-Davis 2011     | The unit of randomizations was the practice and the study participants were physicians and nurses or medical assistants                     |
| 93  | Law 2003              | The study was not RCT                                                                                                                       |
| 94  | Lawson 1991           | The study participants were pharmacists                                                                                                     |
| 95  | Le 2010               | The intervention was web-based                                                                                                              |
| 96  | Lee 2004              | quasi-experimental, crossover design                                                                                                        |
| 97  | Lee 2007              | Data could not be extracted, mix group of health professionals                                                                              |
| 98  | Lee 2016              | Qualitative study, not randomised trial.                                                                                                    |
| 99  | Leopold 2005          | Study was based on teaching psychomotor skills only                                                                                         |
| 100 | Lieberman 2002        | Data could not be extracted, mixed group of residents and medical students                                                                  |
| 101 | Lin 2016              | The study participants were nurses.                                                                                                         |
| 102 | Liu 2014              | The study participants were nurses                                                                                                          |
| 103 | Loewen 2003           | The study participants were mixed group of health professionals and the intervention was videoconference delivery of an education programme |
| 104 | Loveday 2010          | Complex intervention including virtual reality                                                                                              |
| 105 | Mahmud 2013           | The intervention was web-based                                                                                                              |
| 106 | Maloney 2011          | The study participants were not physicians and the intervention was web-based                                                               |
| 107 | Maloney 2012          | The participants were not doctor and the intervention was web-based                                                                         |
| 108 | Martinez-Escobar 2011 | The intervention was based on teaching psychomotor skill only                                                                               |
| 109 | Maunder 2010          | Data could not be extracted, mixed group of health professionals                                                                            |
| 110 | McLain 2012           | The participants were student registered nurse anesthetist and the study design was a randomized controlled crossover trial                 |
| 111 | Monteiro 2016         | Not digital learning                                                                                                                        |
| 112 | Moran 1991            | The participants were not doctor                                                                                                            |
| 113 | Munshi 2016           | The intervention taught psychomotor skill                                                                                                   |
| 114 | Neelankavil 2012      | The intervention was simulation-based                                                                                                       |
| 115 | Nishiyama 2009        | The participants were not doctor                                                                                                            |
| 116 | Padalino 2007         | The study participants were nurses                                                                                                          |
| 117 | Patel 2012            | The intervention was Internet-based                                                                                                         |
| 118 | Patel 2016            | The intervention taught psychomotor skill                                                                                                   |

|     |                   |                                                                                                           |
|-----|-------------------|-----------------------------------------------------------------------------------------------------------|
| 119 | Perkins 2010      | Data could not be extracted: mixed group of health professionals                                          |
| 120 | Peyre 2011        | The intervention was based on teaching psychomotor skill only                                             |
| 121 | Pollak 2016       | The intervention was Internet-based                                                                       |
| 122 | Pusic 2007        | The study participants were medical students                                                              |
| 123 | Rogers 2000       | The study participants were medical students                                                              |
| 124 | Roh 2013          | The study participants were nurses                                                                        |
| 125 | Rosen 2002        | The study participants were nurses                                                                        |
| 126 | Rosenberger 2009  | Data could not be extracted mixed group health practitioners.<br>A study design, no results in this paper |
| 127 | Sanddal 2004      | The participants were not doctor                                                                          |
| 128 | Schell 2004       | The study was not RCT                                                                                     |
| 129 | Schermer 2011     | The study participants were nurses                                                                        |
| 130 | Schneider 2006    | The study participants were nurses                                                                        |
| 131 | Schwid 2001       | The intervention was simulator based                                                                      |
| 132 | Scott 2000        | The intervention was based on teaching psychomotor skill only                                             |
| 133 | Sedlack 2004      | The intervention was based on teaching psychomotor skill only                                             |
| 134 | Shariff 2012      | The intervention was Internet-based                                                                       |
| 135 | Shephard 2009     | The study was not RCT                                                                                     |
| 136 | Sholomskas 2006   | Data could not be extracted, mixed group of health professionals                                          |
| 137 | Singh 2014        | The study participants were medical students                                                              |
| 138 | Skinner 2009      | This is a descriptive non-comparative study.                                                              |
| 139 | Smeekens 2011     | The study participants were nurses                                                                        |
| 140 | Sohmer 2013       | The intervention was based teaching psychomotor skill only                                                |
| 141 | Sohmer 2014       | The intervention was based on teaching psychomotor skill only                                             |
| 142 | Solomon 2004      | The participants were medical students                                                                    |
| 143 | Sperl-Hillen 2010 | The intervention was Internet-based                                                                       |
| 144 | Sperl-Hillen 2013 | The intervention was Internet-based                                                                       |
| 145 | Stout 2012        | Data could not be extracted, mixed group of health professionals                                          |
| 146 | Towbin 2007       | The intervention was simulator- based                                                                     |
| 147 | Ukabiala 2015     | The full text of the abstract published under Lee et al and subsequently excluded from the review.        |
| 148 | Van Es 2015       | The intervention was online                                                                               |
| 149 | VanderWielen 2015 | Psychomoter skills learning                                                                               |
| 150 | Vestal 2017       | Not digital learning                                                                                      |
| 151 | Vollmar 2010      | The intervention was Internet-based                                                                       |
| 152 | Wang 2011         | The intervention was simulator- based                                                                     |
| 153 | Weaver 2016       | Data could not be extracted (mixed group: doctor and nurses)                                              |

|     |                |                                                                                                               |
|-----|----------------|---------------------------------------------------------------------------------------------------------------|
| 154 | Wegener 2013   | The intervention was based on teaching psychomotor skill only                                                 |
| 155 | Weiner 2011    | The study participants were nurses                                                                            |
| 156 | Weingardt 2006 | The study participants were counsellors                                                                       |
| 157 | Wetmore 2016   | The outcome is improved performance which is not investigated by this review as per protocol.                 |
| 158 | Wilfong 2011   | The study participants were nurses and the intervention was based on teaching psychomotor skills on simulator |
| 159 | Woodworth 2014 | The intervention was based on teaching psychomotor skills on simulator                                        |
| 160 | Yao 2016       | Data could not be extracted (mixed group: doctor and nurses),The intervention was Internet-based              |
| 161 | Zhao 2010      | The intervention was simulator- based                                                                         |
| 162 | Zhao 2011      | The intervention was simulator- based                                                                         |
| 163 | Zhao 2011a     | The intervention was simulator-based                                                                          |
| 164 | Bharati 2012   | Abstact                                                                                                       |
| 165 | Juyal 2013     | Abstact                                                                                                       |
| 166 | Khan 2015      | Abstact                                                                                                       |
| 167 | Lichtman 2014  | Abstact                                                                                                       |
| 168 | Muhammad 2010  | Abstact                                                                                                       |

### References:

1. Akar Şerife Zehra, Bebiş Hatice. Evaluation of the effectiveness of testicular cancer and testicular self-examination training for patient care personnel: intervention study. Health Education Research 2014;29(6):966-76.
2. Albert D A, Gordon J, Andrews J, Severson H, Ward A, Sadowsky D. Use of electronic continuing education in dental offices for tobacco cessation. In: Nicotine & Tobacco Research. Vol. 9. Orlando, Florida, February 2007:S137
3. Aly Medhat, Willems Guy, Van Den Noortgate Wim, Elen Jan. Effect of multimedia information sequencing on educational outcome in orthodontic training. European journal of orthodontics 2012;34(4):458-65.
4. Ambrosio Art, Pfannenstiel Travis, Bach Kevin, Cornelissen Chris, Gaconnet Cory, Brigger Matthew T. Difficult airway management for novice physicians: a randomized trial comparing direct and video-assisted laryngoscopy. Otolaryngology--head and neck

surgery : official journal of American Academy of Otolaryngology-Head and Neck Surgery 2014;150(5):775-8.

5. Ameen Jamal, Coll Anne Marie, Peters Melanie. Impact of tele-advice on community nurses' knowledge of venous leg ulcer care. *Journal of advanced nursing* 2005;50(6):583-94.
6. Backstein David, Agnidis Zoe, Regehr Glenn, Reznick Richard. The effectiveness of video feedback in the acquisition of orthopedic technical skills. *American journal of surgery* 2004;187(3):427-32.
7. Backstein David, Agnidis Zoe, Sadhu Ravi, MacRae Helen. Effectiveness of repeated video feedback in the acquisition of a surgical technical skill. *Canadian journal of surgery. Journal canadien de chirurgie* 2005;48(3):195-200.
8. Bayne T, Bindler R. Effectiveness of medication calculation enhancement methods with nurses. *Journal of nursing staff development : JNSD* 1997;13(6):293-301.
9. Beckley S, Stenhouse E, Greene K. The development and evaluation of a computer-assisted teaching programme for intrapartum fetal monitoring. *BJOG* 2000 Sep;107(9):1138-44.
10. Beidas Rinad S, Edmunds Julie M, Marcus Steven C, Kendall Philip C. Training and consultation to promote implementation of an empirically supported treatment: A randomized trial. *Psychiatric Services* 2012;63(7):660-5.
11. Benharash Peyman, Frank Paul, Hoy Brenda. Development and use of a novel cardiovascular simulator: time for a paradigm shift? *The American surgeon* 2012;78(10):1132-6.
12. Benjamin Sara E, Tate Deborah F, Bangdiwala Shrikant I, Neelon Brian H, Ammerman Alice S, Dodds Janice M, et al. Preparing Child Care Health Consultants to address childhood overweight: a randomized controlled trial comparing web to in-person training. *Maternal and child health journal* 2008;12(5):662-9.
13. Bhatia RS , Ivers N, Yin CX, Myers D, Nesbitt G, Edwards J, Yared K, Wadhwa R, Wu JC, Wong B Hansen M, Weinerman A,ShadowitzS Johri A, Farkouh M, Thavendiranathan P, Udell JA, Rambihar S, Chow CM, Hall J, Thorpe KE, Rakowski H, Weiner RB. Design and methods of the Echo WISELY (Will Inappropriate Scenarios for

Echocardiography Lesson Significantly) study: An investigator-blinded randomized controlled trial of education and feedback intervention to reduce inappropriate echocardiograms. *Am Heart J* 2015;170(2):202-9.

14. Bhatti I, Jones K, Richardson L, Foreman D, Lund J, Tierney G. E-learning vs lecture: which is the best approach to surgical teaching? *Colorectal disease : the official journal of the Association of Coloproctology of Great Britain and Ireland* 2011;13(4):459-62.
15. Blair Irvine A, Billow Molly B, Eberhage Mark G, Seeley John R, McMahan Edward, Bourgeois Michelle. Mental illness training for licensed staff in long-term care. *Issues in mental health nursing* 2012;33(3):181-94.
16. Boh LE, Pitterle ME, De Muth JE. Evaluation of an Integrated Audio Cassette and Computer Based Patient Simulation Learning Program. *Am J Pharm Educ* 1990;54(1):15-22.
17. Boncyk CS, Schroeder KM, Anderson B, Galgon RE. Two methods for teaching basic upper airway sonography. *J Clin Anesth* 2016;31:166-72.
18. Box D, Shah N, Mapa B, Nagel R, Way D, Dettorre R, et al. Self-guided video review of performance does not improve learning in basic simulated tasks. *Surgical Endoscopy and Other Interventional Techniques* 2011;25:S285.
19. Brandt Michael G, Davies Edward T. Visual-spatial ability, learning modality and surgical knot tying. *Canadian journal of surgery. Journal canadien de chirurgie* 2006;49(6):412-6.
20. Bredesen IM, Bjørø K, Gunningberg L, Hofoss D. Effect of e-learning program on risk assessment and pressure ulcer classification - A randomized study. *Nurse Educ Today* 2016;40:191-7.
21. Broughton Megan, Smith Erin R, Baker Rosemary, Angwin Anthony J, Pachana Nancy A, Copland David A, et al. Evaluation of a caregiver education program to support memory and communication in dementia: a controlled pretest-posttest study with nursing home staff. *International journal of nursing studies* 2011;48(11):1436-44.
22. Brown R, Butow P, Aldridge J, Uraskova I, Zoller P, Boyle F, et al. The impact of consultation skills training in shared decision making on doctor behavior, confidence and



stress and burnout: A randomized controlled trial. In PSYCHO-ONCOLOGY 2014;23:148-9.

23. Browne L, Mehra S, Rattan R, Thomas G. Comparing lecture and e-learning as pedagogies for new and experienced professionals in dentistry. *British dental journal* 2004;197(2):95-7.
24. Buchanan Helen, Siegfried Nandi, Jelsma Jennifer, Lombard Carl. Comparison of an interactive with a didactic educational intervention for improving the evidence-based practice knowledge of occupational therapists in the public health sector in South Africa: a randomised controlled trial. *Trials* 2014;15:216.
25. Butzlaff M, Vollmar H C, Floer B, Koneczny N, Isfort J, Lange S. Learning with computerized guidelines in general practice?: A randomized controlled trial. *Family practice* 2004;21(2):183-8.
26. Campos Javier H, Hallam Ezra A, Ueda Kenichi. Training in placement of the left-sided double-lumen tube among non-thoracic anaesthesiologists: intubation model simulator versus computer-based digital video disc, a randomised controlled trial. *European journal of anaesthesiology* 2011;28(3):169-74.
27. Chan Samson, Pielak Karen, McIntyre Cheryl, Deeter Brittany, Taddio Anna. Implementation of a new clinical practice guideline regarding pain management during childhood vaccine injections. *Paediatrics & child health* 2013;18(7):367-72.
28. Chen M S, Horrocks E N, Evans R D. Video versus lecture: effective alternatives for orthodontic auxiliary training. *British journal of orthodontics* 1998;25(3):191-5.
29. Chiu Su-Chen, Cheng Kuei-Yueh, Sun Tzu-Kuan, Chang Ku-Chou, Tan Teng-Yeow, Lin Tsu-Kung, et al. The effectiveness of interactive computer assisted instruction compared to videotaped instruction for teaching nurses to assess neurological function of stroke patients: a randomized controlled trial. *International journal of nursing studies* 2009;46(12):1548-56.
30. Clement S, Van Nieuwenhuizen A, Kassam A, Norman I, Flach C, Lazarus A, et al. Recorded versus live social contact interventions to reduce stigma: Randomised controlled trial. *Psychiatrische Praxis* 2011;38(S 01):S07\_4\_RE.

31. Collins AM, Quinlan CS, Dolan RT, O'Neill SP, Tierney P, Cronin KJ, Ridgway PF. Audiovisual preconditioning enhances the efficacy of an anatomical dissection course: A randomised study. *J Plast Reconstr Aesthet Surg* 2015;68(7):1010-5.
32. Cox Jill, Roche Sharon, Van Wynen Elizabeth. The effects of various instructional methods on retention of knowledge about pressure ulcers among critical care and medical-surgical nurses. *Journal of continuing education in nursing* 2011;42(2):71-8.
33. Danley Dale, Gansky Stuart A, Chow Denise, Gerbert Barbara. Preparing dental students to recognize and respond to domestic violence: the impact of a brief tutorial. *Journal of the American Dental Association (1939)* 2004;135(1):67-73.
34. Datta A, Lema P C, Bharati A, Bluvas P, Ryan J. Resident education in ultrasonography: Improving identification of abdominal anatomy and pathology after a multimedia tutorial. *Annals of Emergency Medicine* 2012;60(4):S80-1.
35. Davis James, Crabb Sarah, Rogers Elizabeth, Zamora Javier, Khan Khalid. Computer-based teaching is as good as face to face lecture-based teaching of evidence based medicine: a randomized controlled trial. *Medical teacher* 2008;30(3):302-7.
36. de Beurs Derek P, de Groot Marieke H, de Keijser Jos, Mokkenstorm Jan, van Duijn Erik, de Winter Remco F P, et al. The effect of an e-learning supported Train-the-Trainer programme on implementation of suicide guidelines in mental health care. *Journal of affective disorders* 2015;175:446-53.
37. de Beurs DP, de Groot MH, de Keijser J, van Duijn E, de Winter RF, Kerkhof AJ. Evaluation of benefit to patients of training mental health professionals in suicide guidelines: cluster randomised trial. *Br J Psychiatry* 2016;208(5):477-83.
38. Devitt P, Worthley S, Palmer E, Cehic D. Evaluation of a computer based package on electrocardiography. *Australian and New Zealand journal of medicine* 1998;28(4):432-5.
39. Dimeff Linda A, Woodcock Eric A, Harned Melanie S, Beadnell Blair. Can dialectical behavior therapy be learned in highly structured learning environments? Results from a randomized controlled dissemination trial. *Behavior therapy* 2011;42(2):263-75.
40. Dols C, Forker J, Lumm M, Huff I, Johnson M, Morrell C, et al. Enhancing nurses' reliance on patients' perceptions of pain during pain assessment: a comparison of two educational methods. *Journal of Continuing Education in Nursing* 1995;26(5):209-13.

41. Donyai P, Alexander AM. Training on the use of a bespoke continuing professional development framework improves the quality of CPD records. *Int J Clin Pharm* 2015;37(6):1250-7.
42. Downs Murna, Turner Stephen, Bryans Michelle, Wilcock Jane, Keady John, Levin Enid, et al. Effectiveness of educational interventions in improving detection and management of dementia in primary care: cluster randomised controlled study. *BMJ (Clinical research ed.)* 2006;332(7543):692-6.
43. Dozor A J, Stout J W, Smith K, Zhou C, Solomon C, Mangione-Smith R. Learning A distance: A cluster randomized trial of a program to improve asthma care through interactive, online spirometry training and feedback. *American Journal of Respiratory and Critical Care Medicine* 2011;183(1):A5473.
44. Drevenhorn E, Bengtson A, Nyberg P, Kjellgren KI. Assessment of hypertensive patients' self-care agency after counseling training of nurses. *J Am Assoc Nurse Pract* 2015;27(11):624-30.
45. Ebadi A, Yousefi S, Khaghanizade M, Saeid Y. Assessment Competency of Nurses in Biological Incidents. *Trauma Mon* 2015;20(4):e25607.
46. Edrich T, Stopfkuchen-Evans M, Song P, Szabo A, Dankl D, Scheiermann P, et al. Comparison of web-based to traditional classroom-based training of lung ultrasound for the detection of pneumothorax. *Intensive Care Medicine* 2014;40(1):S203
47. Ekama Ilesanmi R, Morohunfoluwa Oluwatosin O. A Quasi-experimental Study to Assess an Interactive Educational Intervention on Nurses' Knowledge of Pressure Ulcer Prevention in Nigeria. *Ostomy Wound Manage* 2016;62(4):30-40.
48. Elmore B, Ginter B, McGaugh J M, Dority J. Patient simulation improves anesthesiology residents' ability to manage local anesthetic systemic toxicity as measured by written and clinical assessment. In: *Regional Anesthesia and Pain Medicine*. Vol. 38. 2013:354.  
[Other: <http://www.asaabstracts.com/strands/asaabstracts/abstract>.
49. El Saadawi Gilan M, Azevedo Roger, Castine Melissa, Payne Velma, Medvedeva Olga, Tseytlin Eugene, et al. Factors affecting feeling-of-knowing in a medical intelligent tutoring system: the role of immediate feedback as a metacognitive scaffold. *Advances in health sciences education : theory and practice* 2010;15(1):9-30.

50. Erkonen W E, D'Alessandro M P, Galvin J R, Albanese M A, Michaelsen V E. Longitudinal comparison of multimedia textbook instruction with a lecture in radiology education. *Academic radiology* 1994;1(3):287-92.
51. Erler Antje, Beyer Martin, Petersen Juliana J, Saal Kristina, Rath Thomas, Rochon Justine, et al. How to improve drug dosing for patients with renal impairment in primary care - a cluster-randomized controlled trial. *BMC family practice* 2012;13:91.
52. Fernandez R, Pearce M, Grand J A, Rench T A, Jones K A, Chao G T, et al. A randomized comparison study to evaluate the effectiveness of a computerbased teamwork training intervention on medical teamwork and patient care performance. *Academic Emergency Medicine* 2013;20(5):S125.
53. Fisher M J, Broome M E, Friesth B M, Magee T, Frankel R M. The effectiveness of a brief intervention or emotion-focused nurse-parent communication. *Patient Education and Counseling* 2014;96(1):72-8.
54. Friedman C P, Elstein A S, Wolf F M, Murphy G C, Franz T M, Heckerling P S, et al. Enhancement of clinicians' diagnostic reasoning by computer-based consultation: A multisite study of 2 systems. *Journal of the American Medical Association* 1999;282(19):1851-6.
55. Gandsas Alex, McIntire Katherine, Montgomery Kevin, Bumgardner Cody, Rice Linda. The personal digital assistant (PDA) as a tool for telementoring endoscopic procedures. *Studies in health technology and informatics* 2004;98:99-103.
56. Gasko John, Johnson Arthur, Sherner John, Craig John, Gegel Brian, Burgert James, et al. Effects of using simulation versus CD-ROM in the performance of ultrasound-guided regional anesthesia. *AANA journal* 2012;80(4 Suppl):S56-9.
57. Gauger Paul G, Hauge Linnea S, Andreatta Pamela B, Hamstra Stanley J, Hillard Miranda L, Arble Eamonn P, et al. Laparoscopic simulation training with proficiency targets improves practice and performance of novice surgeons. *American journal of surgery* 2010;199(1):72-80.
58. Gelb Douglas J. Is newer necessarily better? Assessment of a computer tutorial on neuroanatomical localization. *Neurology* 2001;56(3):421-2.

59. Geller Berta M, Bogart Andy, Carney Patricia A, Sickles Edward A, Smith Robert, Monsees Barbara, et al. Educational interventions to improve screening mammography interpretation: a randomized controlled trial. *AJR. American journal of roentgenology* 2014;202(6):W586-96.
60. Giglioli S, Boet S, De Gaudio A R, Linden M, Schaeffer R, Bould M D, et al. Self-directed deliberate practice with virtual fiberoptic intubation improves initial skills for anesthesia residents. *Minerva anesthesiologica* 2012;78(4):456-61.
61. Girgis Afaf, Cockburn Jill, Butow Phyllis, Bowman Deborah, Schofield Penelope, Stojanovski Elizabeth, et al. Improving patient emotional functioning and psychological morbidity: evaluation of a consultation skills training program for oncologists. *Patient education and counseling* 2009;77(3):456-62.
62. Glick J, Leibner E, Terndrup T. Improving CPR quality in novice and experienced providers through training with an internal chest compression monitoring device. *Academic Emergency Medicine* 2012;19:S328.
63. Gold J P, Begg W B, Fullerton D, Mathisen D, Olinger G, Orringer M, et al. Successful implementation of a novel internet hybrid surgery curriculum - The early phase outcome of thoracic surgery Prerequisite Curriculum e-learning project. *Annals of Surgery* 2004;240(3):499-507.
64. Guerra-Wallace M, Zuckerbraun N S, Manole M D. nullJust-in-timenuull lumbar puncture simulation training for residents in the pediatric emergency department. *Pediatric Emergency Care* 2010;26(9):702.
65. Hadley Julie, Kulier Regina, Zamora Javier, Coppus Sjors F P J, Weinbrenner Susanne, Meyerrose Berrit, et al. Effectiveness of an e-learning course in evidence-based medicine for foundation (internship) training. *Journal of the Royal Society of Medicine* 2010;103(7):288-94.
66. Hamilton E C, Scott D J, Kapoor A, Nwariaku F, Bergen P C, Rege R V, et al. Improving operative performance using a laparoscopic hernia simulator. *American journal of surgery* 2001;182(6):725-8.

67. Handmaker N S, Hester R K, Delaney H D. Videotaped training in alcohol counseling for obstetric care practitioners: a randomized controlled trial. *Obstetrics and gynecology* 1999;93(2):213-8.
68. Hansen C, Worm B, Dam M, Haase N, Poulsen T, Bendtsen T, Børglum J.. E-learning education for ultrasound-guided peripheral blocks. A prospective study evaluating individual increment in learning curves during a one-month trial period. In: *Regional Anesthesia and Pain Medicine*. Vol. 40. 2015:e110.
69. Harrington Susan S, Walker Bonnie L. A comparison of computer-based and instructor-led training for long-term care staff. *Journal of continuing education in nursing* 2002;33(1):39-45.
70. Harrington Susan S, Walker Bonnie L. Is computer-based instruction an effective way to present fire safety training to long-term care staff? *Journal for nurses in staff development : JNSD : official journal of the National Nursing Staff Development Organization* 2003;19(3):147-54.
71. Harrington Susan S, Walker Bonnie L. The effects of computer-based training on immediate and residual learning of nursing facility staff. *Journal of continuing education in nursing* 2004;35(4):154-7.
72. Harvey L F B, King L, Hur H C. Challenges associated with a self-contained simulation curriculum using a home laparoscopic skills trainer. *Journal of Minimally Invasive Gynecology* 2013;20(6):S130-1.
73. Hashimoto D A, Laura B B, Sirimanna P, Ericsson K A, Williams N N, Darzi A, et al. A randomized controlled trial to assess if deliberate practice on a virtual reality simulator can achieve "expert" surgical performance. *Surgical Endoscopy and Other Interventional Techniques* 2013;27:S338.
74. Hemmati Nima, Omrani Soghra, Hemmati Naser. A Comparison of Internet-Based Learning and Traditional Classroom Lecture to Learn CPR for Continuing Medical Education. *Turkish Online Journal of Distance Education* 2013;14(1):256-65.
75. Holmboe Eric S, Hawkins Richard E, Huot Stephen J. Effects of training in direct observation of medical residents' clinical competence: a randomized trial. *Annals of internal medicine* 2004;140(11):874-81.

76. Holmes J, Carleton S, Hart K, Leblanc D, Lindsell C. Sim-man vs powerpoint for teaching critical care transport medicine airway management decision- Making. *Air Medical Journal* 2012;31(6):257.
77. Horn D L, Radhakrishnan J, Saini S, Pepper G M, Peterson S J. Evaluation of a computer program for teaching laboratory diagnosis of acid-base disorders. *Computers and biomedical research, an international journal* 1992;25(6):562-8.
78. Hsu Li-Ling, Huang Ya-Hsuan, Hsieh Suh-Ing. The effects of scenario-based communication training on nurses' communication competence and self-efficacy and myocardial infarction
79. Hymowitz Norman, Schwab Joseph, Haddock Christopher Keith, Burd Karen M, Pyle Sara. The Pediatric Residency Training on Tobacco Project: baseline findings from the resident tobacco survey and observed structured clinical examinations. *Preventive medicine* 2004;39(3):507-16.
80. Hymowitz Norman, Schwab Joseph V, Haddock Christopher Keith, Pyle Sara A, Schwab Lisa M. The pediatric residency training on tobacco project: four-year resident outcome findings. *Preventive medicine* 2007;45(6):481-90.
81. Jain A, Agarwal R, Chawla D, Paul V, Deorari A. Tele-education vs classroom training of neonatal resuscitation: a randomized trial. *Journal of perinatology : official journal of the California Perinatal Association* 2010;30(12):773-9.
82. Javadi M, Kargar A, Gholami K, Hadjibabaie M, Rashidian A, Torkamandi H, Sarayani A. Didactic Lecture Versus Interactive Workshop for Continuing Pharmacy Education on ReproductiveHealth: A Randomized Controlled Trial. *Eval Health Prof* 2015;38(3):404-18.
83. Karam MD, Thomas GW, Koehler DM, Westerlind BO Lafferty PM, Ohrt GT, Marsh JL, Van Heest AE, Anderson DD. Surgical Coaching from Head-Mounted Video in the Training of Fluoroscopically Guided ArticularFracture Surgery. *J Bone Joint Surg Am* 2015;17;97(12):1031-9.
84. Khouli H I, Jahnes K, Mathew J, Gohil A, Shapiro J, Rose K, et al. Medical residents performance in maximum barrier precautions during central venous catheter placement:

effect of simulation-based training [Abstract]. CHEST Journal 2009;136(4\_MeetingAbstracts):12s.

85. Koropchak Celine M, Pollak Kathryn I, Arnold Robert M, Alexander Stewart C, Skinner Celette Sugg, Olsen Maren K, et al. Studying communication in oncologist-patient encounters: the SCOPE Trial. Palliative medicine 2006;20(8):813-9.
86. Krogh Charlotte Loumann, Ringsted Charlotte, Kromann Charles B, Rasmussen Maria Birkvad, Todsen Tobias, Jorgensen Rasmus Lundhus, et al. Effect of engaging trainees by assessing peer performance: a randomised controlled trial using simulated patient scenarios. BioMed research international 2014;2014:610591.
87. Kulier Regina, Coppus Sjors F P J, Zamora Javier, Hadley Julie, Malick Sadia, Das Kausik, et al. The effectiveness of a clinically integrated e-learning course in evidence-based medicine: a cluster randomised controlled trial. BMC medical education 2009;9:21.
88. Kulier Regina, Khan Khalid S, Gulmezoglu A Metin, Carroli Guillermo, Cecatti Jose G, Germar Maria J, et al. A cluster randomized controlled trial to evaluate the effectiveness of the clinically integrated RHL evidence -based medicine course. Reproductive health 2010;7:8.
89. Kulier Regina, Gulmezoglu Ahmet Metin, Zamora Javier, Plana M Nieves, Carroli Guillermo, Cecatti Jose G, et al. Effectiveness of a clinically integrated e-learning course in evidence-based medicine for reproductive health training: a randomized trial. JAMA 2012;308(21):2218-25.
90. Lange L L, Haak S W, Lincoln M J, Thompson C B, Turner C W, Weir C, et al. Use of Iliad to improve diagnostic performance of nurse practitioner students. The Journal of nursing education 1997;36(1):36-45.
91. Latif R, Memon S, Bautista A, Smith E, Ziegler C, Wadhwa A. A randomized, blinded study to assess the effectiveness of simulation-based training for U/S-guided central venous access placement using aseptic technique. Critical Care Medicine 2009;37(12):A1.
92. Latzke-Davis B, Stout J, Smith K, Solomon C, Garrison M, Mangione-Smith R. Effectiveness of spirometry fundamentals(trademark) for increasing the proper use of



spirometry in patients with asthma and COPD. Primary Care Respiratory Journal 2011;20(4):441-7.

93. Law M, Hurley P, Russell D, King G, Hanna S. Selecting outcomes measures in children's rehabilitation: a comparison of methods [corrected] [published erratum appears in ARCH PHYS MED REHABIL 2004 Feb;85(2):349]. Archives of Physical Medicine & Rehabilitation 2003;84(4):496-9.
94. Lawson K A, Shepherd M D, Gardner V R. USING A COMPUTER-SIMULATION PROGRAM AND A TRADITIONAL APPROACH TO TEACH PHARMACY FINANCIAL MANAGEMENT. American Journal of Pharmaceutical Education 1991;55(3):226-35.
95. Le TT, Rait MA, Jarlsberg LG, Eid NS, Cabana MD. A randomized controlled trial to evaluate the effectiveness of a distance asthma learning program for pediatricians. The Journal of asthma : official journal of the Association for the Care of Asthma 2010;47(3):245-50.
96. Lee M T, Hishinuma E S, Derauf C, Guerrero A P S, Iwaishi L K, Kasuya R T. Smoking cessation counseling training for pediatric residents in the continuity clinic setting. Ambulatory Pediatrics 2004;4(4):289-94.
97. Lee JC, Boyd R, Stuart P. Randomized controlled trial of an instructional DVD for clinical skills teaching. Emergency medicine Australasia : EMA 2007;19(3):241-5.
98. Lee WW, Alkureishi MA, Ukabiala O, Venable LR, Ngooi SS, Staisiunas DD, Wroblewski KE, Arora VM. Patient Perceptions of Electronic Medical Record Use by Faculty and Resident Physicians: A Mixed Methods Study. J Gen Intern Med November 2016;31(11):1315-1322.
99. Leopold S S, Morgan H D, Kadel N J, Gardner G C, Schaad D C, Wolf F M. Impact of educational intervention on confidence and competence in the performance of a simple surgical task. Journal of Bone and Joint Surgery - Series A 2005;87(5):1031-7.
100. Lieberman Gillian, Abramson Richard, Volkan Kevin, McArdle Patricia J. Tutor versus computer: a prospective comparison of interactive tutorial and computer-assisted instruction in radiology education. Academic radiology 2002;9(1):40-9.

101. Lin PY, Chua WL, Mok WQ, Liaw SY. Using a case-based animation on physiological compensatory mechanism to remediate nurses' misconceptions about changes in patient vital signs. *J Clin Nurs* 2016;25(3-4):566-8.
102. Liu Wen- I, Rong Jiin-Ru, Liu Chieh-Yu. Using evidence-integrated e-learning to enhance case management continuing education for psychiatric nurses: a randomised controlled trial with follow-up. *Nurse education today* 2014;34(11):1361-7.
103. Loewen L, Seshia M M K, Fraser Askin D, Cronin C, Roberts S. Effective delivery of neonatal stabilization education using videoconferencing in Manitoba. *Journal of telemedicine and telecare* 2003;9(6):334-8.
104. Loveday Benjamin P T, Oosthuizen George V, Diener B Scott, Windsor John A. A randomized trial evaluating a cognitive simulator for laparoscopic appendectomy. *ANZ journal of surgery* 2010;80(9):588-94.
105. Mahmud Ayesha, Kettle Christine, Bick Debra, Rowley Claire, Rathod Trishna, Belcher John, et al. The development and validation of an internet-based training package for the management of perineal trauma following childbirth: MaternityPEARLS. *Postgraduate medical journal* 2013;89(1053):382-9.
106. Maloney Stephen, Haas Romi, Keating Jennifer L, Molloy Elizabeth, Jolly Brian, Sims Jane, et al. Effectiveness of Web-based versus face-to-face delivery of education in prescription of falls-prevention exercise to health professionals: randomized trial. *Journal of medical Internet research* 2011;13(4):e116.
107. Maloney Stephen, Haas Romi, Keating Jenny L, Molloy Elizabeth, Jolly Brian, Sims Jane, et al. Breakeven, cost benefit, cost effectiveness, and willingness to pay for web-based versus face-to-face education delivery for health professionals. *Journal of medical Internet research* 2012;14(2):e47.
108. Martinez-Escobar M, Juhnke B, Foo E, Hisley K, Lobe T, Winer E. A study evaluating the effectiveness of two-dimensional and three-dimensional medical visualization in anatomy education. *Journal of Laparoendoscopic and Advanced Surgical Techniques* 2011;21(4):A59.
109. Maunder Robert G, Lancee William J, Mae Reet, Vincent Leslie, Peladeau Nathalie, Beduz Mary Agnes, et al. Computer-assisted resilience training to prepare

healthcare workers for pandemic influenza: a randomized trial of the optimal dose of training. *BMC health services research* 2010;10:72.

110. McLain N E, Biddle C, James Cotter J. Anesthesia clinical performance outcomes: Does teaching method make a difference? *AANA Journal* 2012;80(SUPPL.4):S11-6.
111. RS Monteiro, PM Letchworth, JG Evans, MJ Anderson, SP Duff. Obstetric emergency training in a rural South African DGH –simple measures improve knowledge. In: *International Journal of Obstetric Anesthesia*. Vol. 25. May 2016:S35. [DOI: 10.1016/j.ijoa.2016.02.005; [anaes.ac.uk/assets/\\_managed/cms/files/Meeting%20Docs/abstracts/2016/2016\\_IJOA\\_](http://anaes.ac.uk/assets/_managed/cms/files/Meeting%20Docs/abstracts/2016/2016_IJOA_)
112. Moran M L. Hypertext computer-assisted instruction for geriatric physical therapists. *Physical and Occupational Therapy in Geriatrics* 1991;10(2):31-53.
113. MunshiA. G,WatanabeY,McKendy K,ItoY.M ,Fried G. M,Vassiliou M. C,Feldman L. S. Use of a formative feedback tool in place of an expert coach in laparoscopic suturing training: A randomised non-inferiority trial. *Surgical Endoscopy and Other Interventional Technique* 2016;30:S359.
114. Neelankavil Jacques, Howard-Quijano Kimberly, Hsieh Tyken C, Ramsingh Davinder, Scovotti Jennifer C, Chua Jason H, et al. Transthoracic echocardiography simulation is an efficient method to train anesthesiologists in basic transthoracic echocardiography skills. *Anesthesia and analgesia* 2012;115(5):1042-51.
115. Nishiyama C, Iwami T, Kawamura T, Ando M, Kajino K, Yonemoto N, et al. Effectiveness of simplified chest compression-only CPR training program with or without preparatory self-learning video: A randomized controlled trial. *Resuscitation* 2009;80(10):1164-8.
116. Padalino Yara, Peres Heloisa Helena Ciqueto. E-learning: a comparative study for knowledge apprehension among nurses. *Revista latino-americana de enfermagem* 2007;15(3):397-403.
117. Patel Vishal, Aggarwal Rajesh, Osinibi Elizabeth, Taylor Dave, Arora Sonal, Darzi Ara. Operating room introduction for the novice. *American journal of surgery* 2012;203(2):266-75.

118. Patel N. R, Makai G. E, Sloan N. L, Della Badia C. R. Traditional Versus Simulation Resident Surgical Laparoscopic Salpingectomy Training: A Randomized Controlled Trial. *Journal of minimally invasive gynecology* 2016;23(3):372-377.
119. Perkins Gavin D, Fullerton James N, Davis-Gomez Nicole, Davies Robin P, Baldock Catherine, Stevens Harry, et al. The effect of pre-course e-learning prior to advanced life support training: a randomised controlled trial. *Resuscitation* 2010;81(7):877-81.
120. Peyre S E, West A, Pernar L, Hicks G, Smink D. A randomized control study of the effectiveness of video instruction for the acquisition of basic laparoscopic surgical skill. *Journal of the American College of Surgeons* 2011;213(3):S128.
121. Pollak KI, Tulskey JA, Bravender T, Østbye T, Lyna P, Dolor RJ, Coffman CJ, Bilheimer A, Lin PH, Farrell D, Bodner ME, Alexander SC. Teaching primary care physicians the 5 A's for discussing weight with overweight and obese adolescents.. *Patient Educ Couns* 2016;99(10):1620-5.
122. Pusic Martin V, Pachev George S, MacDonald Wendy A. Embedding medical student computer tutorials into a busy emergency department. *Academic emergency medicine : official journal of the Society for Academic Emergency Medicine* 2007;14(2):138-48.
123. Rogers D A, Regehr G, Gelula M, Yeh K A, Howdieshell T R, Webb W. Peer teaching and computer-assisted learning: An effective combination for surgical skill training? *The Journal of surgical research* 2000;92(1):53-5.
124. Roh Young Sook, Lee Woo Sook, Chung Hyun Soo, Park Young Mi. The effects of simulation-based resuscitation training on nurses' self-efficacy and satisfaction. *Nurse education today* 2013;33(2):123-8.
125. Rosen Jules, Mulsant Benoit H, Kollar Marcia, Kastango Kari B, Mazumdar Sati, Fox Debra. Mental health training for nursing home staff using computer-based interactive video: a 6-month randomized trial. *Journal of the American Medical Directors Association* 2002;3(5):291-6.

126. Rosenberger Erica L, Goff David C Jr, Blackwell Caroline S, Williams Dustin T, Crago O Lenore, Ellis Shellie D, et al. Implementing a palm pilot intervention for primary care providers: lessons learned. *Contemporary clinical trials* 2009;30(4):321-5.
127. Sanddal Nels D, Sanddal Teri L, Pullum Jeri D, Altenhofen Katrina B, Werner Susan M, Mayberry James, et al. A randomized, prospective, multisite comparison of pediatric prehospital training methods. *Pediatric emergency care* 2004;20(2):94-100.
128. Schell Scott R, Flynn Timothy C. Web-based minimally invasive surgery training: competency assessment in PGY 1-2 surgical residents. *Current surgery* 2004;61(1):120-4.
129. R, Akkermans Reinier P, Crockett Alan J, van Montfort Marian, Grootens-Stekelenburg Joke, Stout Jim W, et al. Effect of e-learning and repeated performance feedback on spirometry test quality in family practice: a cluster trial. *Annals of family medicine* 2011;9(4):330-6.
130. Schneider Philip J, Pedersen Craig A, Montanya Kathryn R, Curran Christine R, Harpe Spencer E, Bohenek Wayne, et al. Improving the safety of medication administration using an interactive CD-ROM program. *American journal of health-system pharmacy : AJHP : official journal of the American Society of Health-System Pharmacists* 2006;63(1):59-64.
131. Schwid H A, Rooke G A, Michalowski P, Ross B K. Screen-based anesthesia simulation with debriefing improves performance in a mannequin-based anesthesia simulator. *Teaching and learning in medicine* 2001;13(2):92-6.
132. Scott D J, Rege R V, Bergen P C, Guo W D A, Laycock R, Tesfay S T, et al. Measuring operative performance after laparoscopic skills training: Edited videotape versus direct observation. *Journal of Laparoendoscopic & Advanced Surgical Techniques-Part A* 2000;10(4):183-90.
133. Sedlack Robert E, Kolars Joseph C. Computer simulator training enhances the competency of gastroenterology fellows at colonoscopy: results of a pilot study. *The American journal of gastroenterology* 2004;99(1):33-7.
134. Shariff U, Kullar N, Haray P N, Dorudi S, Balasubramanian S. Multimedia educational tool for cognitive surgical skill acquisition in open and laparoscopic colorectal surgery. *Colorectal Disease* 2012;14:18.

135. Shephard Mark D, Mazzachi Beryl C, Watkinson Les, Shephard Anne K, Laurence Caroline, Gialamas Angela, et al. Evaluation of a training program for device operators in the Australian Government's Point of Care Testing in General Practice Trial: issues and implications for rural and remote practices. *Rural and remote health* 2009;9(3):1189.
136. Sholomskas Diane E, Carroll Kathleen M. One small step for manuals: Computer-assisted training in twelve-step facilitation. *Journal of studies on alcohol* 2006;67(6):939-45.
137. Singh P, Aggarwal R, Tahir M, Pucher P H, Darzi A. A randomized controlled study to evaluate the role of video-based coaching in training laparoscopic skills. *Annals of Surgery* 2014;261(5):862-869.
138. Skinner Celette Sugg, Pollak Kathryn I, Farrell David, Olsen Maren K, Jeffreys Amy S, Tulsy James A. Use of and reactions to a tailored cd-rom designed to enhance oncologist-patient communication: The scope trial intervention. *Patient Education and Counseling* 2009;77(1):90-6.
139. Smeekens A E F N, Broekhuijsen-van Henten D M, Sittig J S, Russel I M B, ten Cate O Th J, Turner N M, et al. Successful e-learning programme on the detection of child abuse in emergency departments: a randomised controlled trial. *Archives of disease in childhood* 2011;96(4):330-4.
140. Sohmer B, Hudson C, Hudson J, Posner G, Naik V. Psychomotor readiness of beginner echocardiographers nullprobenull. *Canadian Journal of Anesthesia* 2013;60(1):S42.
141. Sohmer B, Hudson C, Hudson J, Posner G D, Naik V. Transesophageal echocardiography simulation is an effective tool in teaching psychomotor skills to novice echocardiographers. *Canadian Journal of Anesthesia* 2014;61(3):235-41.
142. Solomon David J, Ferenchick Gary S, Laird-Fick Heather S, Kavanaugh Kevin. A randomized trial comparing digital and live lecture formats [ISRCTN40455708. *BMC medical education* 2004;4:27.

143. Sperl-Hillen J M, O'Connor P J, Rush W A, Johnson P E, Gilmer T, Biltz G, et al. Simulated physician learning program improves glucose control in adults with diabetes. *Diabetes care* 2010;33(8):1727-1733.
144. Sperl-Hillen J A, O'Connor P, Rush W, Ekstrom H, Appana D, Fernandes O, et al. Simulated provider training improves diabetes management. *Journal of Diabetes Science and Technology* 2013;7(1):A130.
145. Stout James W, Smith Karen, Zhou Chuan, Solomon Cam, Dozor Allen J, Garrison Michelle M, et al. Learning from a distance: effectiveness of online spirometry training in improving asthma care. *Academic pediatrics* 2012;12(2):88-95.
146. Towbin Alexander J, Paterson Brian, Chang Paul J. A computer-based radiology simulator as a learning tool to help prepare first-year residents for being on call. *Academic radiology* 2007;14(10):1271-83.
147. Obiama Ukabiala, Wei Wei Lee, Lollita Alkureishi, Laura Ruth Venable, Samantha Ngooi, Jeanne M. Farnan Vineet M. Arora. "I JUST WANT MY DOCTOR'S UNDIVIDED ATTENTION": PATIENT PERCEPTIONS OF THE IMPACT OF EMR USE ON COMMUNICATION. *Journal of General Internal Medicine* 2015;30(Suppl 2):45.
148. VanderWielen BA, Harris R, Galgon RE, VanderWielen LM, Schroeder KM. Teaching sonoanatomy to anesthesia faculty and residents: utility of hands-on gel phantom and instructional video training models. *J Clin Anesth* 2015;27(3):188-94.
149. Van Es SL, Pryor WM, Belinson Z, Salisbury EL, Velan GM. Cytopathology whole slide images and virtual microscopy adaptive tutorials: A software pilot.. *J Pathol Inform.* 2015 28;6:54;6:54.
150. Vestal HS, Sowden G, Nejad S, Stoklosa J, Valcourt SC, Keary C, Caminis A, Huffman J. Simulation-Based Training for Residents in the Management of Acute Agitation: A Cluster Randomized Controlled Trial. *Acad Psychiatry* 2017;41(1):62-67.
151. Vollmar H C, Mayer H, Ostermann T, Butzlaff M E, Sandars J E, Wilm S, et al. Knowledge transfer for the management of dementia: a cluster-randomised trial of blended learning in general practice. *Implementation Science* 2010;5:10.

152. Wang Carolyn L, Schopp Jennifer G, Petscavage Jonelle M, Paladin Angelisa M, Richardson Michael L, Bush William H. Prospective randomized comparison of standard didactic lecture versus high-fidelity simulation for radiology resident contrast reaction management training. *AJR. American journal of roentgenology* 2011;196(6):1288-95.
153. Weaver MR, Pillay E, Jed SL, de Kadt J, Galagan S, Gilvydis J, Marumo E, Mawandia S, Naidoo E, Owens T, Prongay V, O'Malley G. Three methods of delivering clinic-based training on syndromic management of sexually transmitted diseases in South Africa: a pilot study. *Sex Transm Infect* 2016;92(2):135-41.
154. Wegener Jessica T, van Doorn C Thea, Eshuis Jan H, Hollmann Markus W, Preckel Benedikt, Stevens Markus F. Value of an electronic tutorial for image interpretation in ultrasound-guided regional anesthesia. *Regional anesthesia and pain medicine* 2013;38(1):44-9.
155. Weiner Gary M, Menghini Karin, Zaichkin Jeanette, Caid Ann E, Jacoby Carrie J, Simon Wendy M. Self-directed versus traditional classroom training for neonatal resuscitation. *Pediatrics* 2011;127(4):713-9.
156. Weingardt Kenneth R, Villafranca Steven W, Levin Cindy. Technology-based training in cognitive behavioral therapy for substance abuse counselors. *Substance abuse : official publication of the Association for Medical Education and Research in Substance Abuse* 2006;27(3):19-25.
157. Wetmore D, Goldberg A, Gandhi N, Spivack J, McCormick P, DeMaria S Jr. An embedded checklist in the Anesthesia Information Management System improves pre-anaesthetic induction setup: a randomised controlled trial in a simulation setting. *BMJ Qual Saf* 2016;25(10):739-46.
158. Wilfong D N, Falsetti D J, McKinnon J L, Daniel L H, Wan Q. The effects of virtual intravenous and patient simulator training compared to the traditional approach of teaching nurses. *Journal of Infusion Nursing* 2011;34(1):55-62.
159. Woodworth, G. E., Chen, E. M., Horn, J. L. E., & Aziz, M. F.. Efficacy of computer-based video and simulation in ultrasound-guided regional anesthesia training.. *Journal of clinical anesthesia* 2014;26(3):212-221.



160. Yao K1, Uedo et al Development of an E-learning System for the Endoscopic Diagnosis of Early Gastric Cancer: An International Multicenter Randomized Controlled Trial. *EBio Medicine* 2016;9:140-7.
161. Zhao Y C, Hall R, Kennedy G, Leary S J O'. Does virtual reality simulation training improve real life performances? Results from a randomised control trial [Abstract]. *Anz Journal of Surgery*. 2010;80(s1):A80.
162. Zhao Yi C, Kennedy Gregor, Yukawa Kumiko, Pyman Brian, O'Leary Stephen. Can virtual reality simulator be used as a training aid to improve cadaver temporal bone dissection? Results of a randomized blinded control trial. *The Laryngoscope* 2011;121(4):831-7.
163. Zhao Yi Chen, Kennedy Gregor, Yukawa Kumiko, Pyman Brian, O'Leary Stephen. Improving temporal bone dissection using self-directed virtual reality simulation: results of a randomized blinded control trial. *Otolaryngology--head and neck surgery : official journal of American Academy of Otolaryngology-Head and Neck Surgery* 2011;144(3):357-64.
164. Bharati A, Datta A, Gupta S, Chun-Lema P, Ryan J. Resident education in ultrasonography: Assessment of identification of basic cardiac anatomy and pathology after a multimedia tutorial. *Annals of Emergency Medicine* 2012;60(4):S41.
165. Juyal M, Ware A, Houk J, Mina R. Electronic learning module enhances rheumatology education. *Arthritis and Rheumatism* 2013;65:S411.
166. Khan T, Cinnor B, Gupta N, Hosford L, Bansal A, Olyae M, Wani S, Rastogi A. Comparison of classroom didactic teaching (DT) and computer based self-learning (SI) in recognizing narrow band imaging (NBI) patterns for diminutive polyp (DP) histology characterization. *Gastrointestinal Endoscopy* 2015;81(5):AB325.
167. Lichtman A S, Goff B, Schreuder H W R, Lenihan Jr J, Lefebvre G, Parker W, et al. A validation study: Does use of an interactive computer based laparoscopic hysterectomy trainer expand cognitive surgical knowledge of ob/gyn trainees beyond that of traditional educational tools? *Journal of Minimally Invasive Gynecology* 2014;21(6):S87.

168. Muhammad A, Nutland S, Unsworth J. Electronic vs. standard learning in hospital trust induction for junior doctors - a randomized trial. *British Journal of Surgery* 2010;97:49-50.
