# Supplementary material for: Medical Doctors’ Offline Computer-Assisted Digital Education: Systematic Review by the Digital Health Education Collaboration
Source: PubMed Central journal article supplement (PMC6418481; doi:10.2196/12998), 2019-03-01
Supplement: jmir_v21i2e12998_app5.pdf [file jmir_v21i2e12998_app5.pdf]

**Medical doctors' offline-computer-assessed digital education: a systematic review by the Digital Health Education collaboration**

**Online Supplementary Document 4**

---

**Evers checklist for economic evaluation**

| No | Item                                                                                                            | Yes | No |
|----|-----------------------------------------------------------------------------------------------------------------|-----|----|
| 1  | Is the study population clearly described?                                                                      | √   |    |
| 2  | Are competing alternatives clearly described?                                                                   | √   |    |
| 3  | Is a well-defined research question posed in answerable form?                                                   | √   |    |
| 4  | Is the economic study design appropriate to the stated objective?                                               | √   |    |
| 5  | Is the chosen time horizon appropriate to include relevant costs and consequences?                              | √   |    |
| 6  | Is the actual perspective chosen appropriate?                                                                   | √   |    |
| 7  | Are all important and relevant costs for each alternative identified?                                           |     | √  |
| 8  | Are all costs measured appropriately in physical units?                                                         | √   |    |
| 9  | Are costs valued appropriately?                                                                                 | √   |    |
| 10 | Are all important and relevant outcomes for each alternative identified?                                        | √   |    |
| 11 | Are all outcomes measured appropriately?                                                                        | √   |    |
| 12 | Are outcomes valued appropriately?                                                                              | √   |    |
| 13 | Is an incremental analysis of costs and outcomes of alternatives performed?                                     | √   |    |
| 14 | Are all future costs and outcomes discounted appropriately?                                                     |     | √  |
| 15 | Are all important variables, whose values are uncertain, appropriately subjected to sensitivity analysis?       | √   |    |
| 16 | Do the conclusions follow from the data reported?                                                               | √   |    |
| 17 | Does the study discuss the generalizability of the results to other settings and patient/ client groups?        |     | √  |
| 18 | Does the article indicate that there is no potential conflict of interest of study researcher(s) and funder(s)? | √   |    |
| 19 | Are ethical and distributional issues discussed appropriately?                                                  | √   |    |

1. Evers Evers S, Goossens M, de Vet H, van Tulder M, Ament A. Criteria list for assessment of methodological quality of economic evaluations: Consensus on Health Economic Criteria. *International Journal of Technology Assessment in Health Care*. 2005; 21:240-5.
